# Supplementary material
Source: PubMed Central journal article supplement (PMC10631803)
Supplement: sxad063_suppl_supplementary_material.pdf [file sxad063_suppl_supplementary_material.pdf]

## Supplemental Data

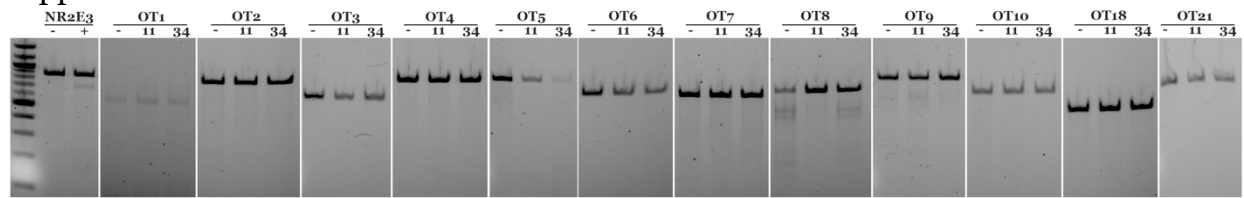

**Figure S1. Off-target analysis of clone 11 or 34 iPSCs.** The top 10 off-target sites and 2 additional exonic loci were selected from the top 24 off-target sites, predicted via Benchling. Representative gel images of T7E1 assays for each off-target locus in non-CRISPR treated (-) and CRISPR corrected iPSCs (clones 11 and 34).
